# Supplementary material for: STAT3 Inhibition Combined with CpG Immunostimulation Activates Antitumor Immunity to Eradicate Genetically Distinct Castration-Resistant Prostate Cancers
Source: Oxford University Press journal article supplement (doi:10.1158/1078-0432.ccr-18-1277), 2018-10-19
Supplement: 10780432ccr181277-sup-200747_2_supp_4916043_pcxhxp.pdf [file 10780432ccr181277-sup-200747_2_supp_4916043_pcxhxp.pdf]

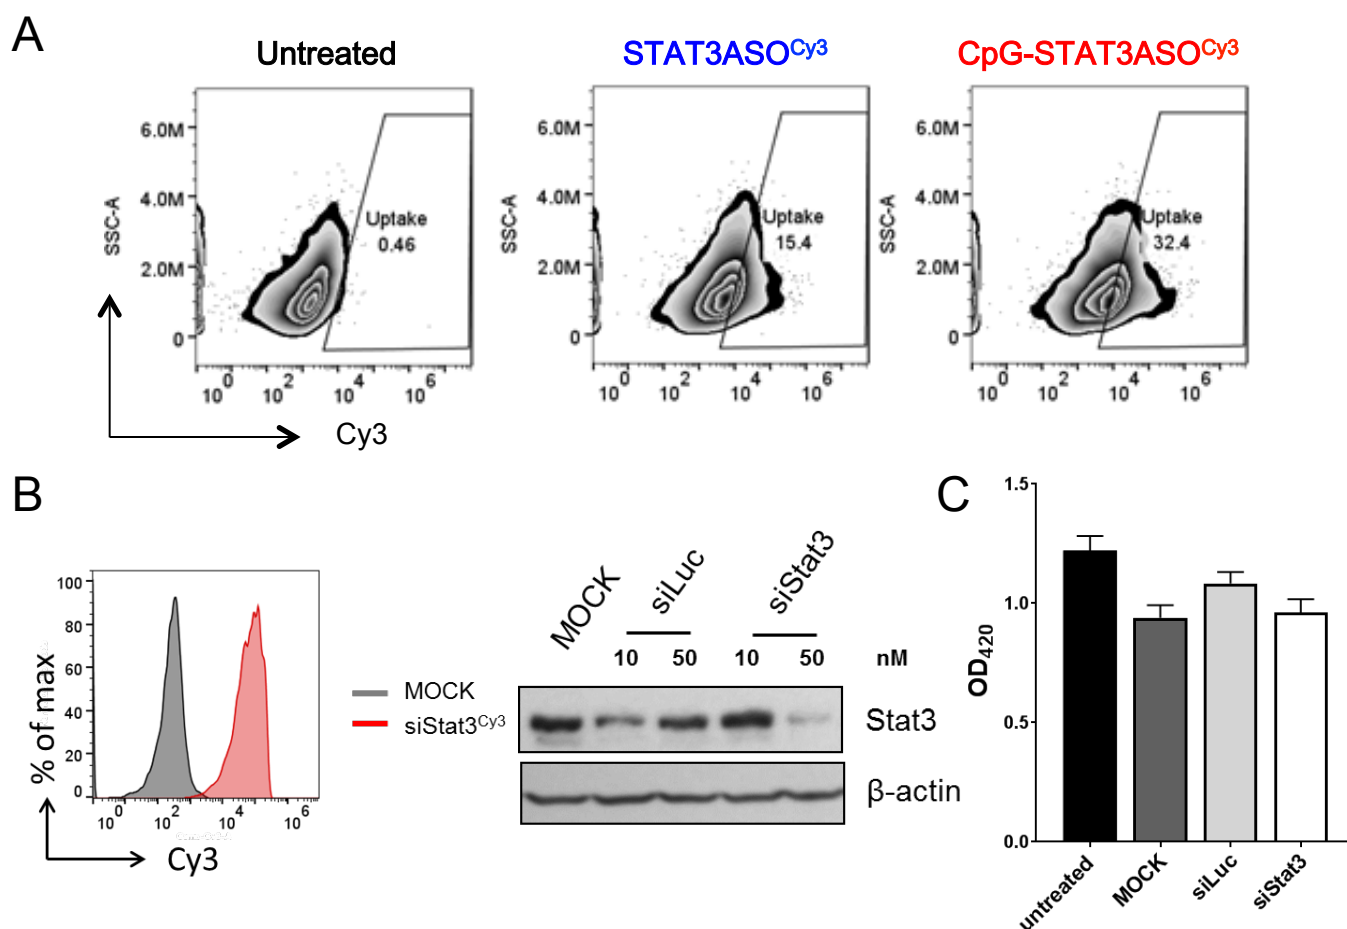

**Supplemental Figure S5. *STAT3* silencing does not significantly affect PPS prostate cancer cell viability.** (A) Internalization of STAT3ASO and CpG-STAT3ASO oligonucleotides by PPS cells as assessed using flow cytometry. PPS cells were incubated with 500nM of STAT3ASO<sup>Cy3</sup> or CpG-STAT3ASO<sup>Cy3</sup> oligonucleotides for 1 h. STAT3 silencing does not affect cell proliferation. (B) PPS cells were transfected with 10 nM and 50 nM of STAT3 siRNA or control Luciferase siRNA using Oligofectamine transfection reagent. The transfection efficiency and STAT3 knockdown was verified using flow cytometry after 24 h (B, left panel) and Western Blot after 48 h (B, right panel), respectively. (C) Number of viable PPS cells were measured in various treatment groups using Cell Counting Kit-8, 72 h after transfection; means+SEM.
