# Supplementary material for: STAT3 Inhibition Combined with CpG Immunostimulation Activates Antitumor Immunity to Eradicate Genetically Distinct Castration-Resistant Prostate Cancers
Source: Oxford University Press journal article supplement (doi:10.1158/1078-0432.ccr-18-1277), 2018-10-19
Supplement: 10780432ccr181277-sup-200747_2_supp_4916045_pcvhvp.pdf [file 10780432ccr181277-sup-200747_2_supp_4916045_pcvhvp.pdf]

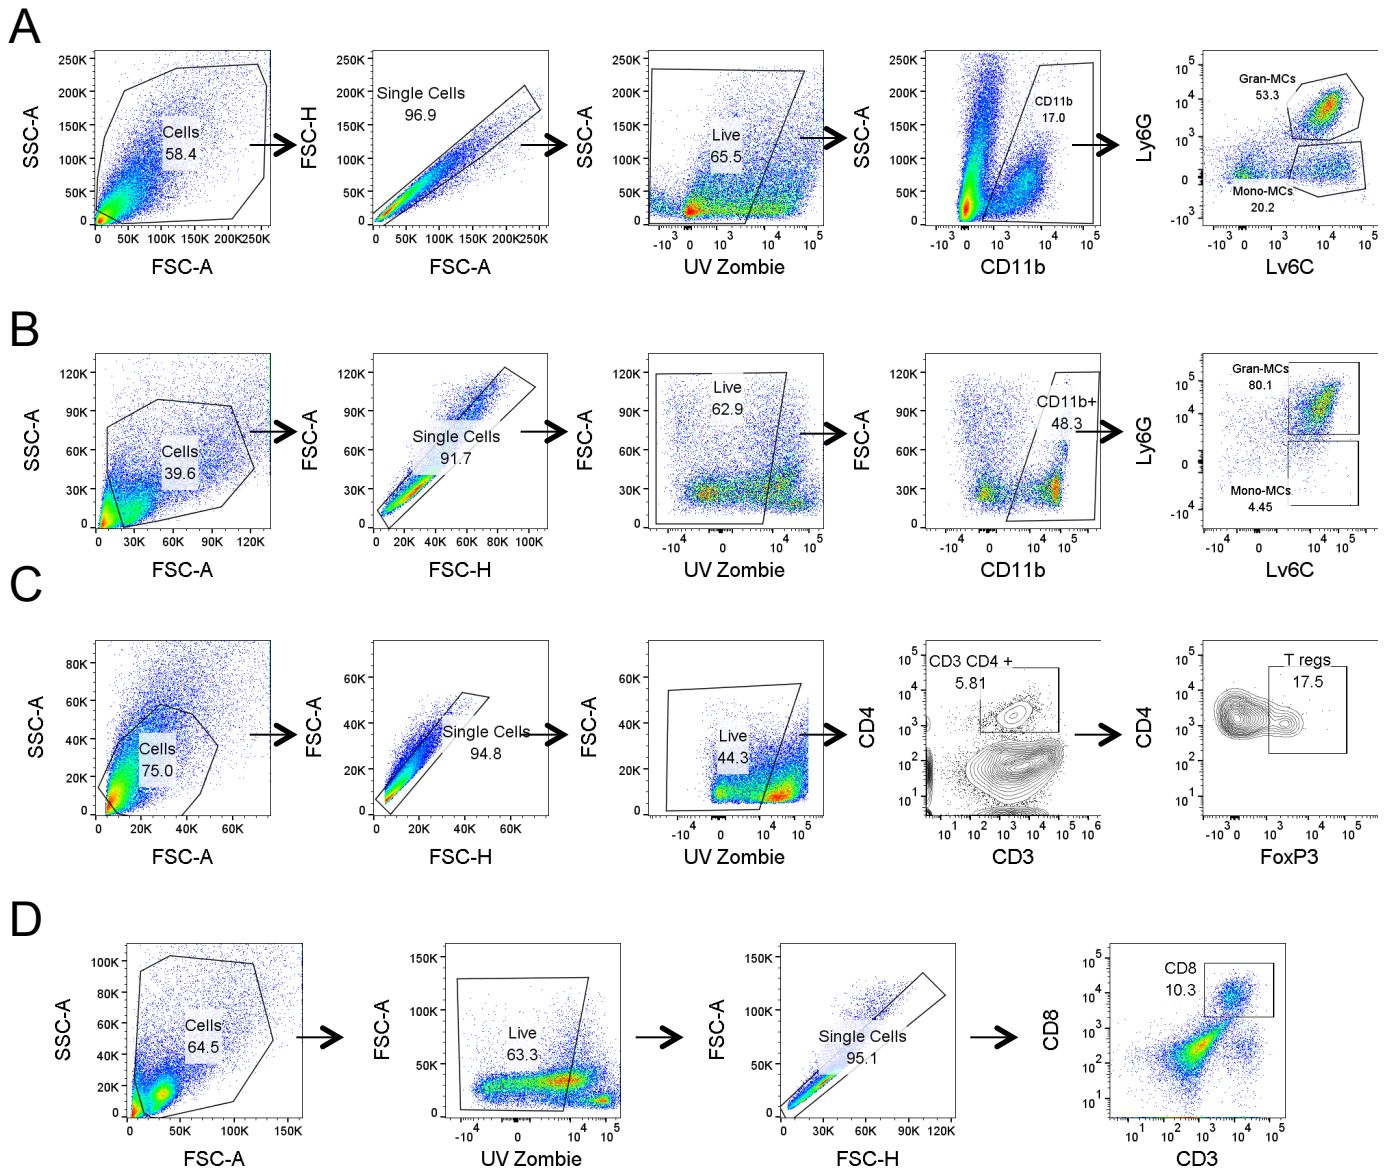

**Supplemental Figure S7. Gating strategy for characterization of immune cell populations infiltrating mouse RM9 and PPS prostate tumors.** Gating strategy for detection of CD11b<sup>+</sup>Ly6C<sup>+</sup> and CD11b<sup>+</sup>Ly6G<sup>+</sup> cells (putative monocytic and granulocytic MDSCs) in RM9 (A) and PPS (B) tumors. Gating strategy for identification of regulatory T cells (C) and CD8<sup>+</sup> T cells (D) infiltrating tumors.
